# Supplementary material
Source: PubMed Central journal article supplement (PMC10406879)
Supplement: 41418_2023_1177_MOESM1_ESM.pdf [file 41418_2023_1177_MOESM1_ESM.pdf]

# C2C7 cells

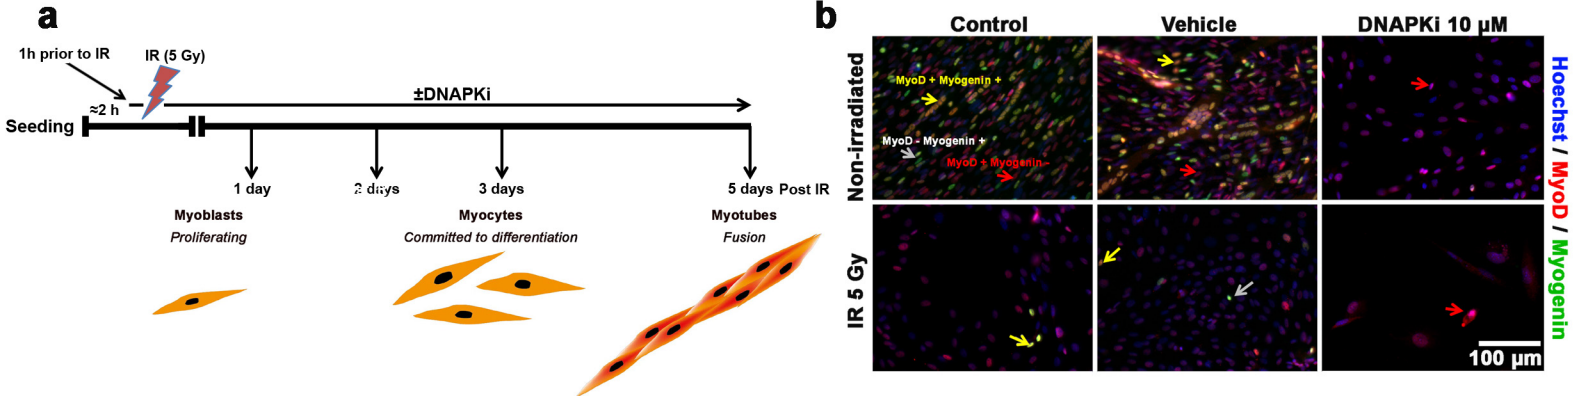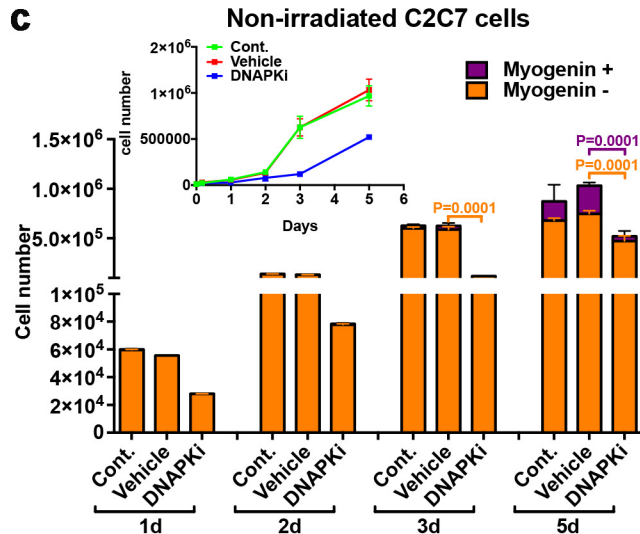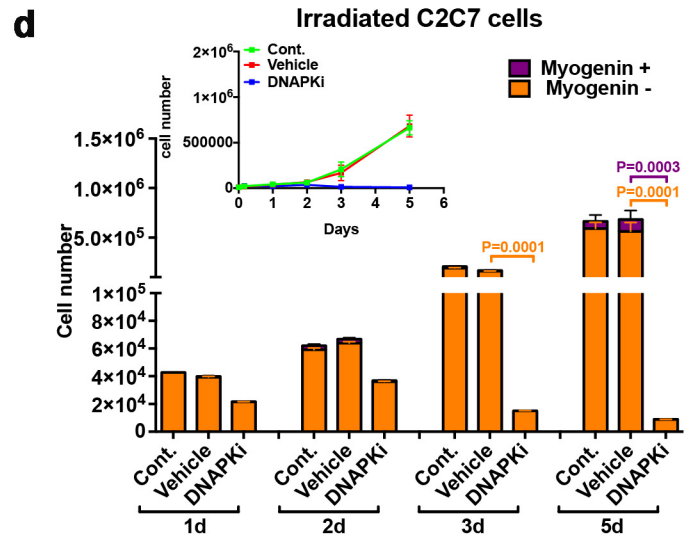

Figure S2



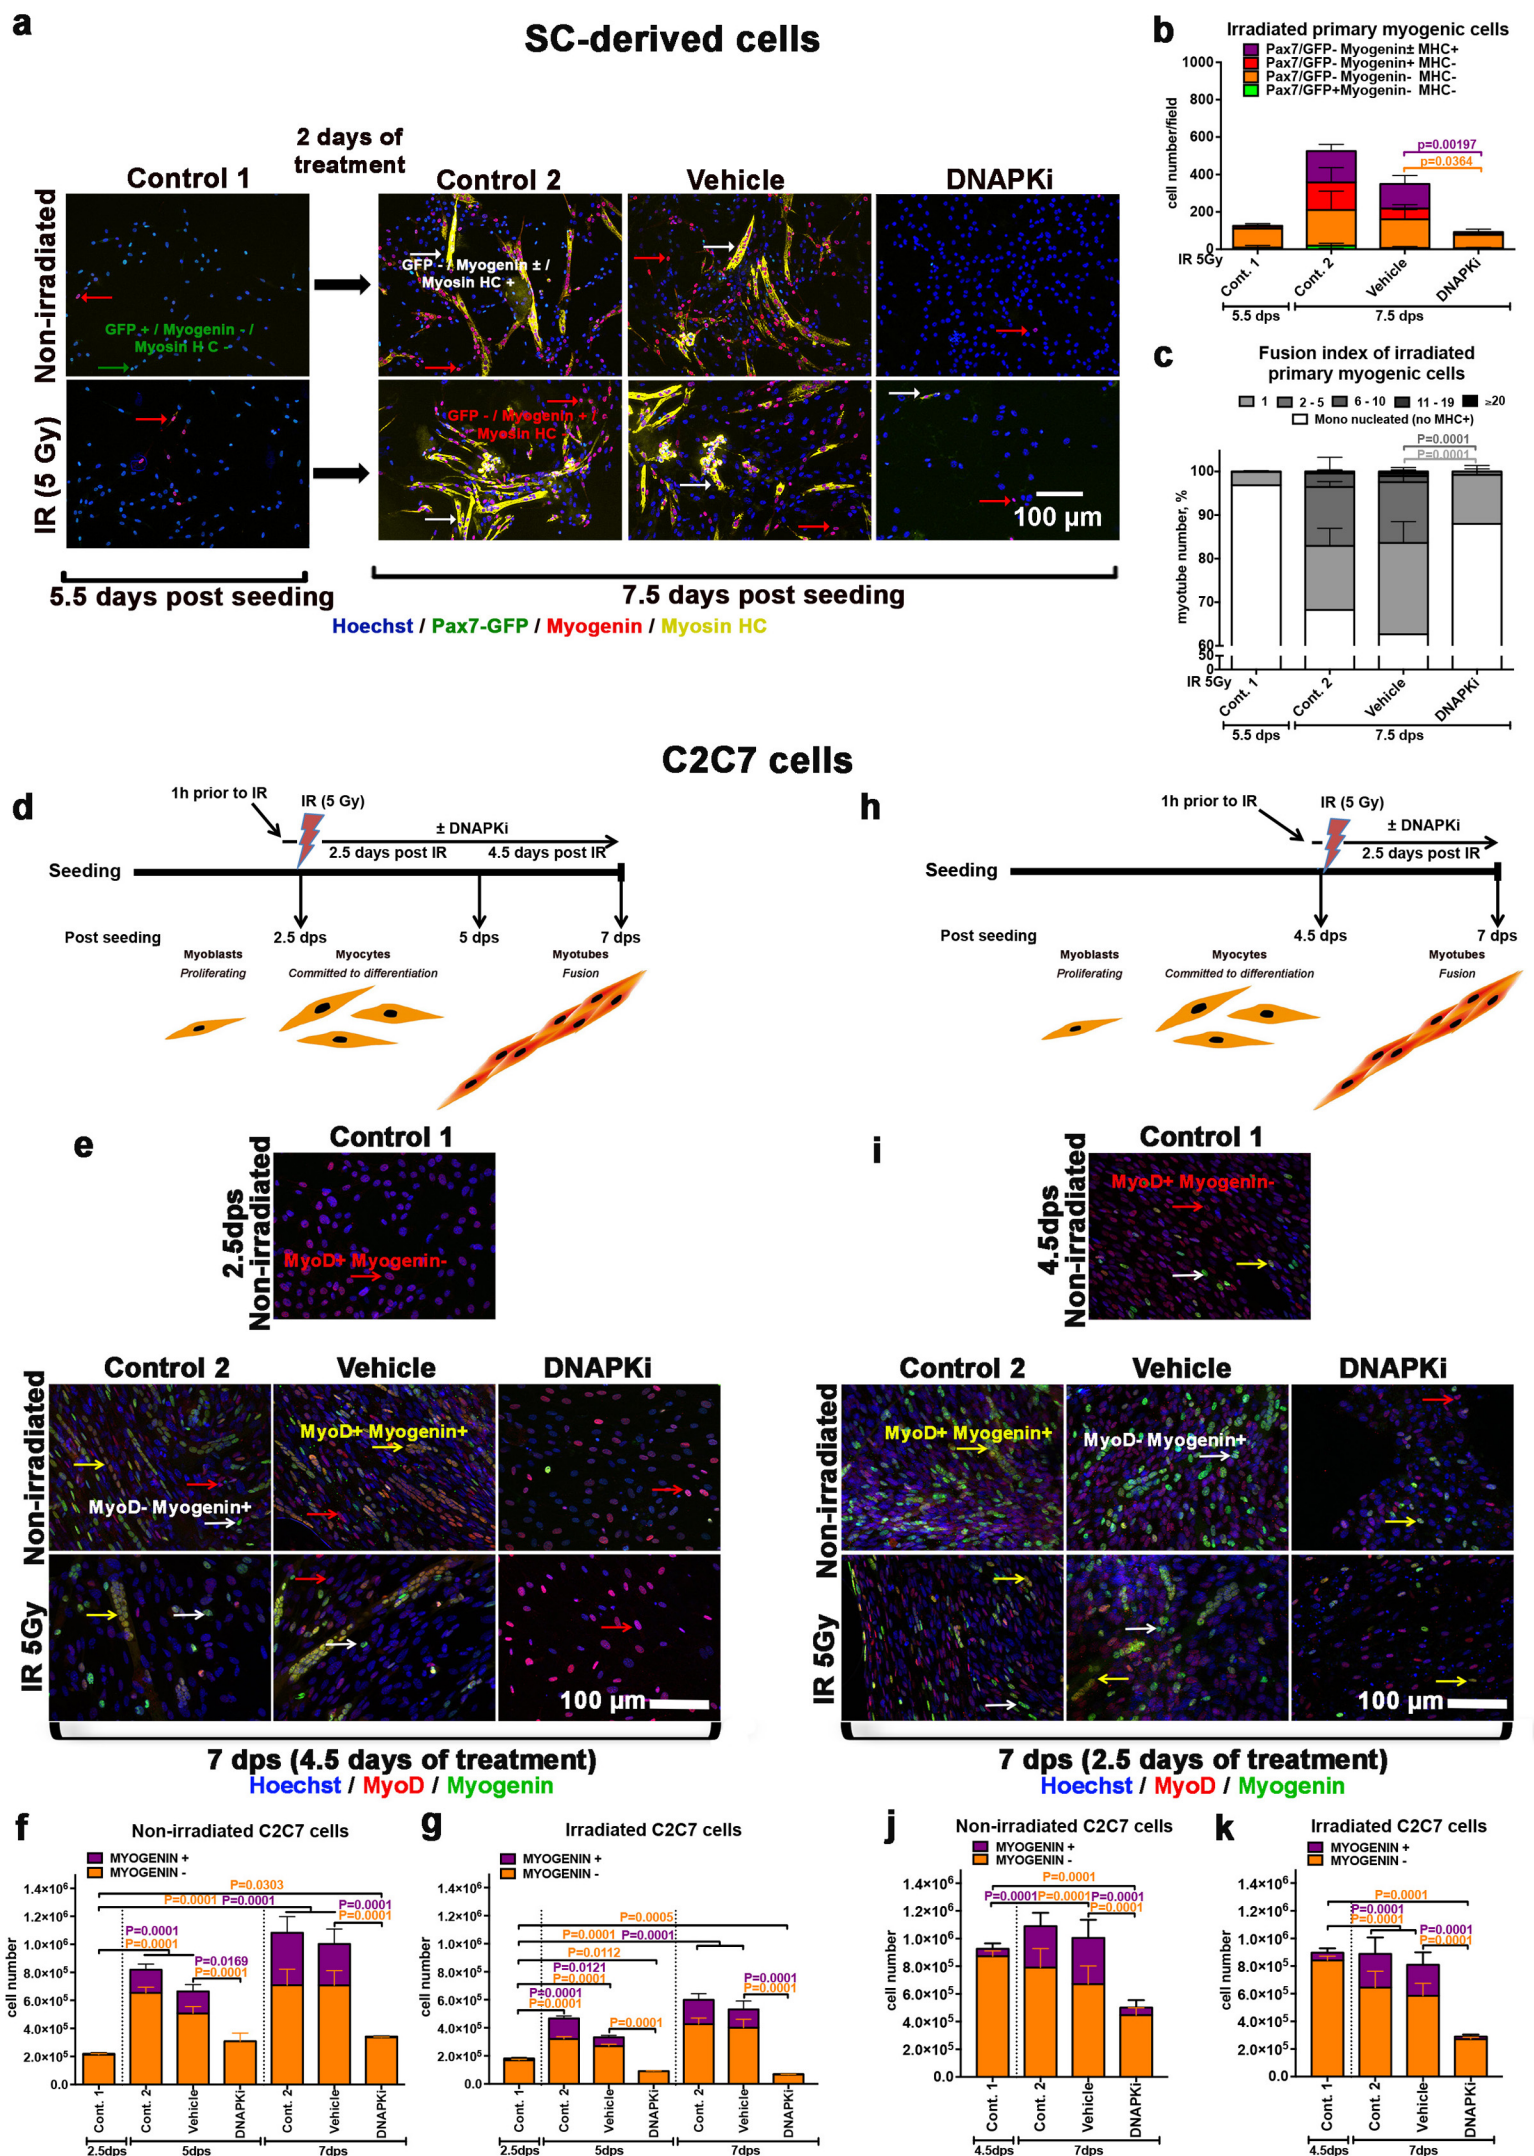

**Figure S3**



**2 days**

**5 days**

**7 days post seeding**

**0 days**

**3 days**

**5 days**

**5 days**

**± vehicle / inhibitors  
in GM**

**± vehicle / inhibitors  
in GM**

**± vehicle / inhibitors  
in GM**

**± vehicle / inhibitors  
in DM**

**Control**

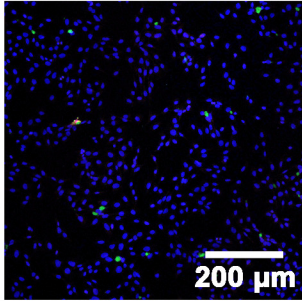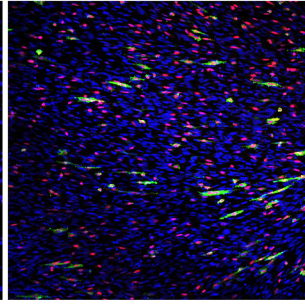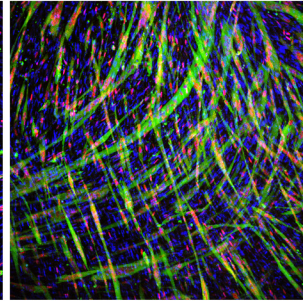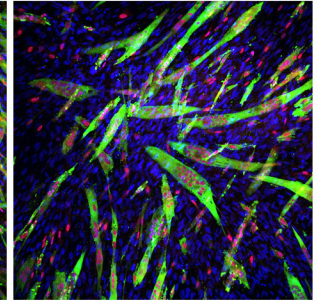

**Vehicle**

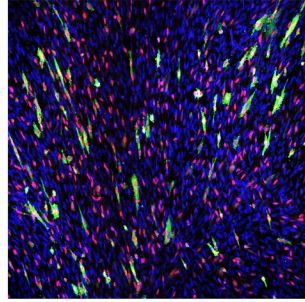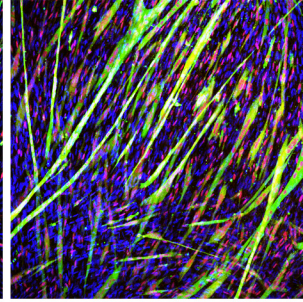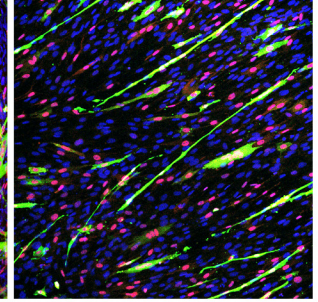

**Q-VD-OpH 30 μM**

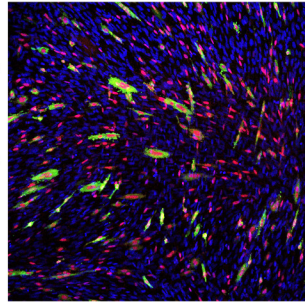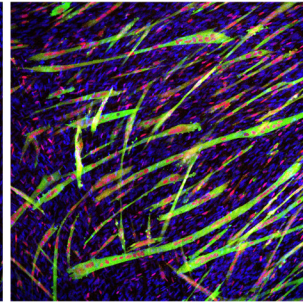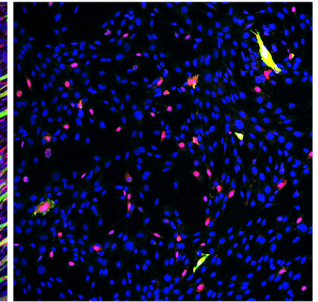

**NU7441 1 μM**

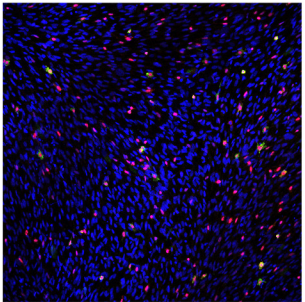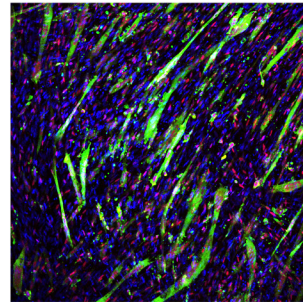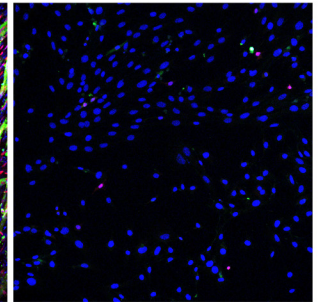

**NU7441 10 μM**

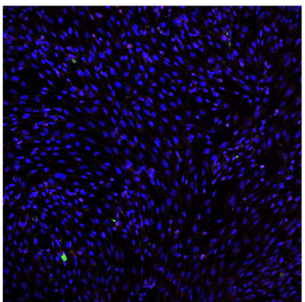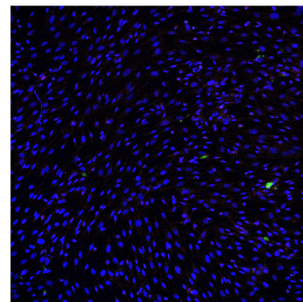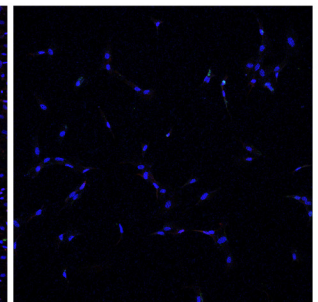

**Myogenin / Myosin HC / Hoechst**

**Figure S4**



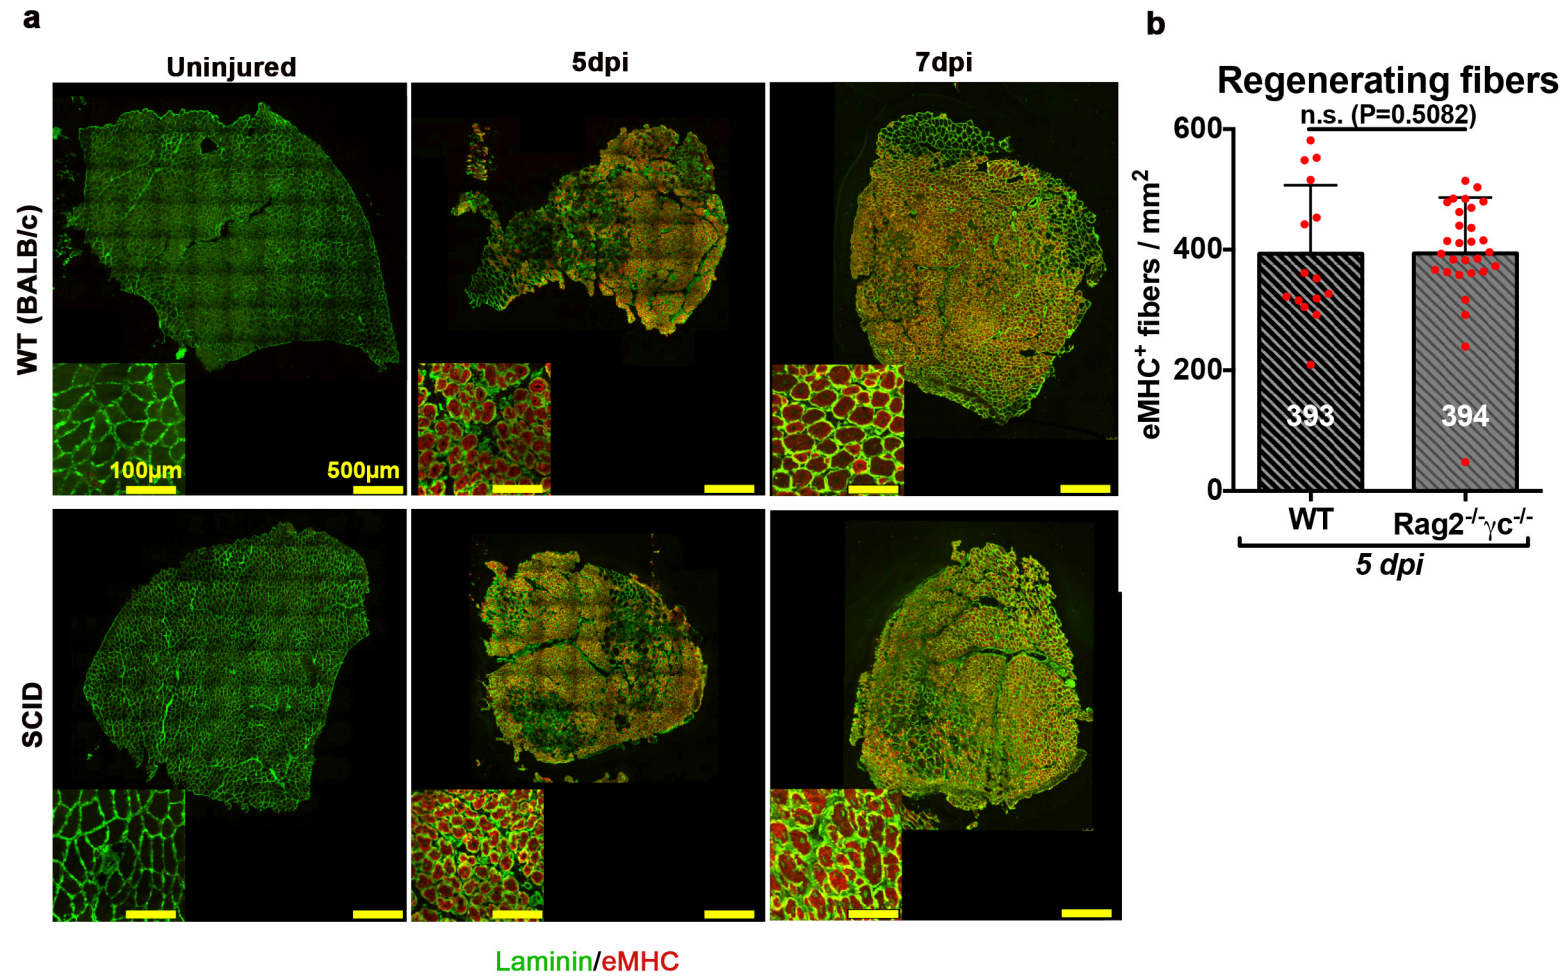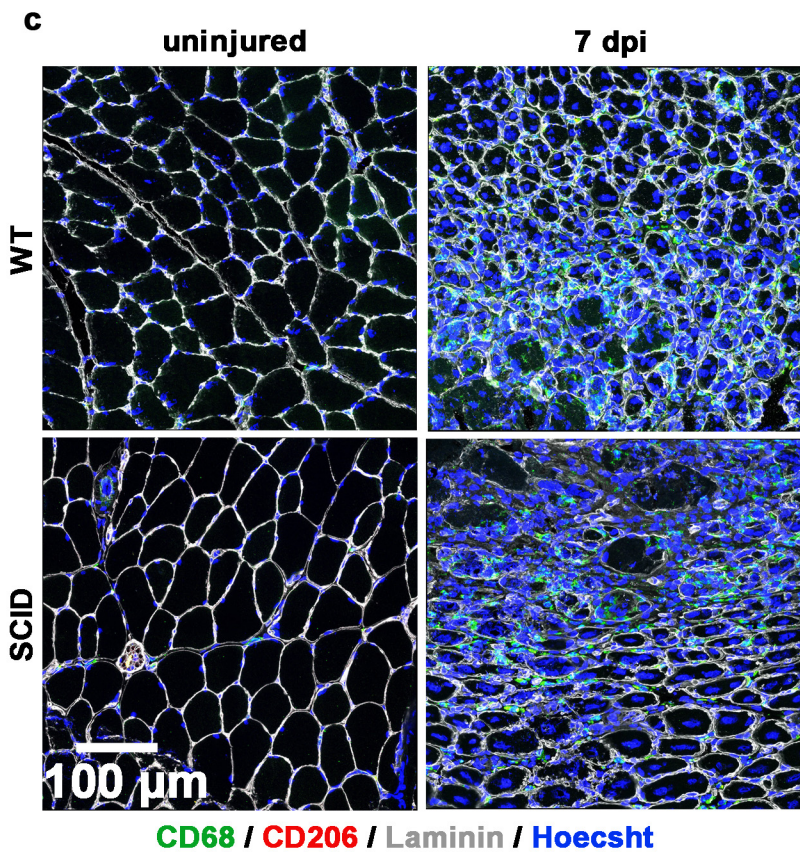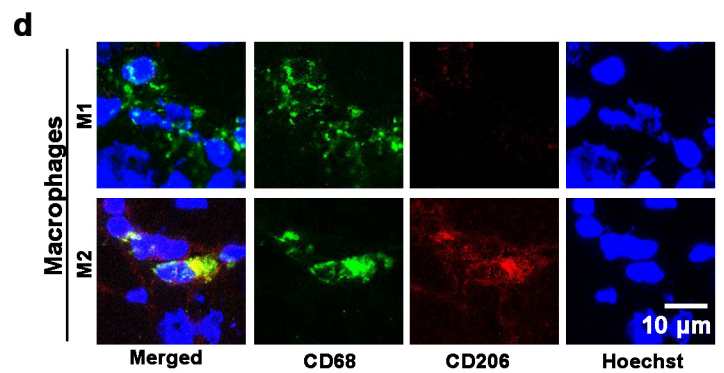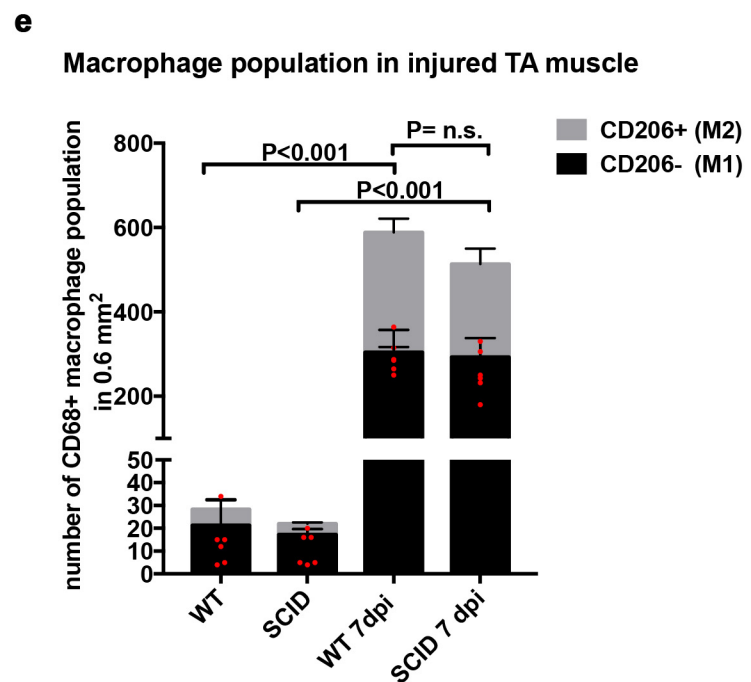

Figure S5

**a**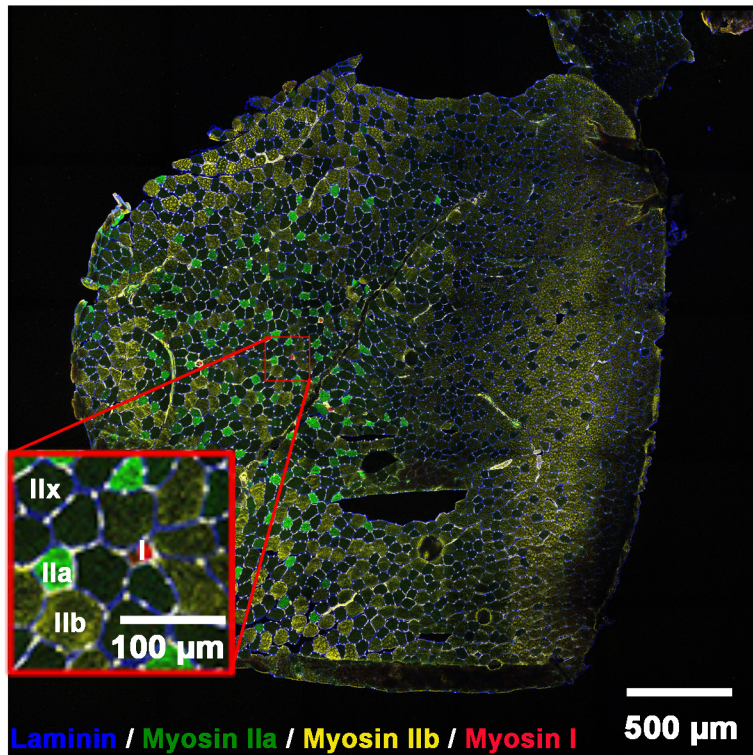**b**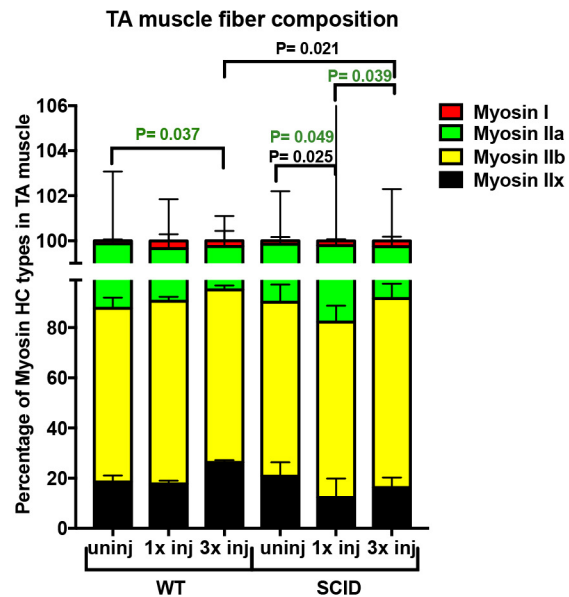**Figure S6**



## Supplementary Tables

| Weight of TA muscle (mg) |              |              |              |              |              |
|--------------------------|--------------|--------------|--------------|--------------|--------------|
| No Injury                |              |              |              |              |              |
| 11 weeks old             | 15 weeks old | 19 weeks old | 11 weeks old | 15 weeks old | 19 weeks old |
| WT                       | WT           | WT           | SCID         | SCID         | SCID         |
| 58.4                     | 56.2         | 60.9         | 57.8         | 62.0         | 66.4         |
| 78.3                     | 65.0         | 58.7         | 57.3         | 60.9         | 57.3         |
| 69.4                     | 65.0         | 62.4         | 68.9         | 58.3         | 55.1         |
| 61.6                     | 68.0         | 68.4         | 58.5         | 51.2         | 54.4         |
| 58.1                     | NA           | NA           | 49.7         | 40.0         | 58.8         |
| 1 x injury               |              |              |              |              |              |
| 1 x injury               | 2 x injuries | 3 x injuries | 1 x injury   | 2 x injuries | 3 x injuries |
| 11 weeks old             | 15 weeks old | 19 weeks old | 11 weeks old | 15 weeks old | 19 weeks old |
| WT                       | WT           | WT           | SCID         | SCID         | SCID         |
| 63.3                     | 77.8         | 86.5         | 57.1         | 75.5         | 78.3         |
| 83.1                     | 80.9         | 88.1         | 54.5         | 76.0         | 66.4         |
| 72.3                     | 86.3         | 85.7         | 66.5         | 71.6         | 65.1         |
| 47.0                     | 73.8         | 80.8         | 60.4         | 62.0         | 67.3         |
| 67.5                     | NA           | NA           | 61.3         | 68.6         | 69.5         |

**Supplementary Table S1:** TA muscle weight after 1, 2, or 3 injuries, or uninjured, from WT and SCID mice. NA: not applicable.

| Genotype                                                 | Phenotype                                                 | Genetic Background | References |
|----------------------------------------------------------|-----------------------------------------------------------|--------------------|------------|
| <i>Pax7<sup>mGFP/+</sup></i>                             | Pax7 – GFP positive                                       | B6D2/F1            | [1]        |
| CB17/lcr-<br><i>Prkdc<sup>scid/scid</sup>/lcr</i> lcoCrI | DNAPK deficient, B- and T-cell deficient                  | Balb/c             | [2,3]      |
| Balb/cAnN <sup>+/+</sup>                                 | WT control for SCID                                       | Balb/c             | -          |
| <i>Rag2<sup>-/-</sup> γc<sup>-/-</sup></i>               | Rag2 deficient, B-, T-cells and NK deficient              | C57BL/B6           | [4]        |
| B6 <sup>+/+</sup>                                        | WT control for <i>Rag2<sup>-/-</sup> γc<sup>-/-</sup></i> | C57BL/B6           | -          |

**Supplementary Table S2: List of mice strains used.** The genotype, phenotype, and genetic background of each strain are indicated.

| Mission shRNA Library (Sigma) | Plasmid             | Target gene              |
|-------------------------------|---------------------|--------------------------|
| Ref:SHC002                    | pLKO.1_Puro control | shRNA (sh Control) (SCR) |
| Ref:TRCN0000023863            | pLKO.1_Puro DNAPKcs | shRNA (sh DNAPKcs-1)     |
| Ref:TRCN0000361373            | pLKO.1_Puro DNAPKcs | shRNA (sh DNAPKcs-2)     |
| Ref:TRCN0000310882            | pLKO.1_Puro Akt2    | shRNA (sh Akt2-1)        |
| Ref:TRCN0000301381            | pLKO.1_Puro Akt2    | shRNA (sh Akt2-2)        |
| Ref:TRCN0000304684            | pLKO.1_Puro Akt     | shRNA (sh Akt1)          |

**Supplementary Table S3: List of shRNAs.** Reference numbers, plasmid codes, and target genes are indicated. SCR, scramble.



| Regions | Primer  | Sequence (5'-3')       | Reference       |
|---------|---------|------------------------|-----------------|
| MyoG-1  | Forward | GTTGAGGCTGCCAAGAAGAC   | This study      |
|         | Reverse | GTCTCCCTTCCTTCCTGGTC   |                 |
| MyoG-2  | Forward | TTTGTCCCAACCAGGAAGAG   | This study      |
|         | Reverse | CTGGAGGCAGAAGAAGTTGG   |                 |
| MyoG-4  | Forward | TGTAGCTCTGATGGCCTGTG   | This study      |
|         | Reverse | TCCCTCCCCTTTTGTTTTCT   |                 |
| MyoG-5  | Forward | GCTGACAGAGGCCAAGATTC   | This study      |
|         | Reverse | TGCTTTCCCCTCAATAATGC   |                 |
| MyoG-6  | Forward | GGAATCACATGTAATCCACTGG | [5]; this study |
|         | Reverse | TCACACCAACTGCTGGGT     |                 |

**Supplementary Table S4:** Primer pairs used to assess the promoter region of *MyoG*. The primers have been designed to amplify regions up to 7kbp upstream of the *MyoG* initiation of transcription, where an enhancer region has been previously described [6].

#### References Supplementary Material

1. Sambasivan R, Gayraud-Morel B, Dumas G, Cimper C, Paisant S, Kelly RG, *et al.* Distinct regulatory cascades govern extraocular and pharyngeal arch muscle progenitor cell fates. *Developmental cell* 2009, **16**(6): 810-821. DOI: 10.1016/j.devcel.2009.05.008.
2. Bosma GC, Custer RP, Bosma MJ. A severe combined immunodeficiency mutation in the mouse. *Nature* 1983, **301**(5900): 527-530.
3. Bosma MJ, Carroll AM. The SCID mouse mutant: definition, characterization, and potential uses. *Annual review of immunology* 1991, **9**: 323-350. DOI: 10.1146/annurev.iy.09.040191.001543.
4. Colucci F, Soudais C, Rosmaraki E, Vanes L, Tybulewicz VL, Di Santo JP. Dissecting NK cell development using a novel alymphoid mouse model: investigating the role of the c-abl proto-oncogene in murine NK cell differentiation. *Journal of immunology (Baltimore, Md : 1950)* 1999, **162**(5): 2761-2765.
5. Londhe P, Davie JK. Sequential association of myogenic regulatory factors and E proteins at muscle-specific genes. *Skeletal muscle* 2011, **1**(1): 14. DOI: 10.1186/2044-5040-1-14.
6. Faralli H, Dilworth FJ. Turning on myogenin in muscle: a paradigm for understanding mechanisms of tissue-specific gene expression. *Comparative and functional genomics* 2012, **2012**: 836374. DOI: 10.1155/2012/836374.

## Supplementary Figure Legends

### Supplementary Figure S1. Inhibition of DNA-PKcs blocks myogenic differentiation of satellite cells in the presence and in the absence of irradiation (induced DSBs)

**a)** Representative merged images of immunofluorescent labelling of cells 5 days post-IR (and non-irradiated controls): MyoD (red), Myogenin (green), and nuclei counterstained with Hoechst (blue). Representative cells with progressively increased levels of differentiations are indicated with red arrows (MyoD<sup>+</sup>/Myogenin<sup>-</sup> cells, in red), yellow arrows (MyoD<sup>+</sup>/Myogenin<sup>+</sup> cells, in yellow), and white arrows (MyoD<sup>-</sup>/Myogenin<sup>+</sup> cells, in green). **b)** Histograms of myogenic differentiation and growth curves of non-irradiated cells  $\pm$  DNAPKi. Proliferation evaluated with the cell number, and differentiation with immunofluorescence of myogenic markers. Each condition was tested with SC derived from n=3-7 mice, mean  $\pm$  SD. Myogenic markers have been analysed in 5-10 fields/condition (2,000-5,000 cells), and extrapolated to the total cell number. Significance evaluated by 2-way ANOVA (F=8.6, DF<sub>n</sub>=28, DF<sub>d</sub>=147, p<0.000001), with post-hoc Dunnett's multiple comparisons test; significant P values are indicated in histogram. P values and bars are of the same colour as the category that is compared. Panels a-b, experimental conditions as in Fig. 1a. **c)** C2C7 cell number upon irradiation in the presence of increasing doses of DNAPKi, or in the absence of inhibitor. Cells were treated and irradiated at 2.5 dps and harvested at 5 dps. N=3 independent experiments, mean  $\pm$  SD, Significance by 2-way ANOVA (F=6.20, DF<sub>n</sub>=4, DF<sub>d</sub>=22, p<0.0017), with post-hoc Dunnett's multiple comparisons test against vehicle (DMSO), significant P values are indicated on histogram. The concentration of DNAPKi corresponding to the lowest dose that blocks cell proliferation upon irradiation (10  $\mu$ M) was used in this study, unless otherwise specified. **d)** Representative images of panel c. **e)** Representative images of SCs cells 4h and 6h post-IR, and non-irradiated controls, immunostained for the DSB repair markers  $\gamma$ H2AX (green) and 53BP1 (red), nuclei



counterstained with Hoechst (blue), and merge. Efficiency of DSB repair is evaluated by disappearance of repair markers. Histogram report the number of **f**)  $\gamma$ H2AX foci/cell (nucleus) and **g**) 53BP1 foci/cell (nucleus) from 4h to 24h post irradiation. Mean  $\pm$  SEM for each condition. Significance by 1-way ANOVA ( $\gamma$ H2AX: F=174, DF<sub>n</sub>=17, DF<sub>d</sub>=1892, p<0.0001. 53BP1: F=103.2, DF<sub>n</sub>=17, DF<sub>d</sub>=1892, p<0.0001) significant P values by post-hoc Tukey's multiple comparisons test are indicated on histogram n=30-40 cells/condition. N= 3 independent experiments.

### **Supplementary Figure S2. DNA-PKcs inhibitor blocks differentiation of C2C7 cells in the presence and in the absence of irradiation**

**a**) Schematic representation of the experiment. Immortalized myogenic C2C7 cells were pre-treated with DNA-PKi before irradiation (or no-IR) and kept in culture for 1 to 5 days before analysis. **b**) Representative merge images of immunofluorescent labelling of cells 5 days post-IR (and non-irradiated controls). Proliferation was evaluated by the cell number and differentiation by myogenic markers, as in Fig 1. MyoD (red), Myogenin (green), and nuclei are counterstained with Hoechst (blue). Representative cells with progressively increased stage of differentiations are indicated with red arrows (MyoD<sup>+</sup>/Myogenin<sup>-</sup> cells, in red), yellow arrows (MyoD<sup>+</sup>/Myogenin<sup>+</sup> cells, in yellow), and white arrows (MyoD<sup>-</sup>/Myogenin<sup>+</sup> cells, in green). Undifferentiated C2C7 myoblasts are originally MyoD<sup>+</sup>. Histograms of myogenic differentiation and growth curves of **c**) non-irradiated and **c**) irradiated C2C7 cells  $\pm$  DNAPKi. Significance by 2-way ANOVA (Non-irradiated: F=112.8, DF<sub>n</sub>=11, DF<sub>d</sub>=47, p<0.0001. Irradiated: F=87.06, DF<sub>n</sub>=11, DF<sub>d</sub>=48, p<0.0001), with post-hoc Dunnett's multiple comparisons test, significant P values are indicated on the histogram. The P values and error bars are of the same colour as the category that is compared. n=3

experiments per condition, mean  $\pm$  SD. Myogenic markers have been analysed in 5-10 fields/condition (2,000-5,000 cells), and extrapolated to the total cell number.

**Supplementary Figure S3. DNA-PKcs inhibitor affects myogenesis by reducing proliferation and blocking differentiation of myogenic cells**

**a)** Immunolabelling of SC-derived cells at 5.5 dps without DNAPKi treatment (control 1; at this time point cells were essentially myoblasts [88% Myog<sup>-</sup> and Myosin Heavy Chain, MHC<sup>-</sup>, a structural marker for myotube formation]) and 7.5 dps (with and without [control 2 and vehicle] DNAPKi treatment). Merge of MHC (yellow), Myogenin (red), Pax7-nGFP (green) and Hoechst counterstaining (nuclei, blue). Representative MHC<sup>+</sup> structures are indicated with a white arrow, Myogenin<sup>+</sup> cells (red) with a red arrow, and Pax7-GFP<sup>+</sup> cells (green) with a green arrow. **b)** Histograms display the cell number and differentiation stage of irradiated SC-derived cells treated or not with DNAPKi, and defined by the indicated combinations of myogenic markers (as in Fig. 1d). Myogenic markers have been analysed in 5-10 fields/condition and extrapolated to the total cell number. mean  $\pm$  SD for each category. Significance by 2-way ANOVA (F=2.53, DF<sub>n</sub>=9, DF<sub>d</sub>=32, p=0.0255), with post-hoc Dunnett's multiple comparisons test; significant P values are indicated in histogram. P values and error bars are of the same colour as the category that is compared. **c)** Fusion indexes of irradiated SC-derived cells by enumeration of nuclei/myotube (as in Fig. 1e). Significance by 2-way ANOVA (F=31.70, DF<sub>n</sub>=15, DF<sub>d</sub>=40, p<0.0001), with post-hoc Dunnett's multiple comparisons test; significant P values are indicated in histogram. P values and error bars are of the same colour as the category that is compared. Significance bars are of the same colour as the category that is compared. n=3 experiments, n=2,500-5,000 cells analysed/condition, mean  $\pm$  SD. Panels a-c, experimental conditions as in Fig. 1c. Treatment with DNAPKi in committed C2C7 cells (**d-g**) and during differentiation (**h-k**). For simplification,

differentiation was evaluated considering Myogenin<sup>+</sup> versus Myogenin<sup>-</sup> cells. **d)** Schematic representation of the experiment. At 2.5 dps, during mid myogenesis cells were pretreated for 1h with 10  $\mu$ M of DNAPKi or the corresponding volume of vehicle before irradiation (or were not irradiated), and then analysed at 5 and 7 dps. This experiment mimics the condition of SCs in Fig. 1c, as indicated by comparable ratio of Myog<sup>+</sup>/Myog<sup>-</sup> cells in control samples (see panel a). Proliferation evaluated with the cell number, and differentiation assessed with immunofluorescence of myogenic markers (MyoD, Myogenin). **e)** Representative merge images of immunofluorescent labelling of cells at 2.5dps and 7dps: MyoD (red), Myogenin (green), nuclei counterstained with Hoechst (blue). Representative cells with progressively increased levels of differentiations are indicated: red arrows (MyoD<sup>+</sup>/Myogenin<sup>-</sup> cells, in red), yellow arrows (MyoD<sup>+</sup>/Myogenin<sup>+</sup> cells, in yellow), and white arrows (MyoD<sup>-</sup>/Myogenin<sup>+</sup> cells, in green). Histograms of the cell number and differentiation state of **f)** non-irradiated and **g)** irradiated C2C7 cells treated or not with DNAPKi. The differentiation state is defined by Myogenin immunolabelling: Myogenin<sup>-</sup> cells [undifferentiated] and Myogenin<sup>+</sup> [differentiated] cells are shown in the orange and purple part of columns, respectively. Significance by 2-way ANOVA (Non-irradiated: F=7.997, DFn=6, DFd=107, p<0.0001. Irradiated: F=12.68, DFn=6, DFd=103, p<0.0001), with post-hoc Dunnett's multiple comparisons test, significant P values are indicated in histogram. The P values and error bars are of the same colour as the category that is compared. **h)** Schematic representation of the experiment, which consists in a later stage, with myogenic cells having extensively proliferated, and which are expected to differentiate and form myotubes before treatment. At 4.5 dps, during advanced myogenesis, cells were pretreated for 1h with 10  $\mu$ M of DNAPKi or the corresponding volume of vehicle before irradiation (or were not irradiated), and then analysed at 7 dps. **i)** Representative merge images of immunofluorescent labelling of cells at 4.5 and 7 dps: the indications are in same colour as in panel e. Histograms of the cell number



and differentiation stage of **j**) non-irradiated and **k**) irradiated C2C7 cells treated (or not) with DNAPKi, and defined as in panels c and d. Significance by 2-way ANOVA (Non-irradiated:  $F=41.38$ ,  $DFn=3$ ,  $DFd=98$ ,  $p<0.0001$ . Irradiated:  $F=39.58$ ,  $DFn=3$ ,  $DFd=100$ ,  $p<0.0001$ ), with post-hoc Dunnett's multiple comparisons test, significant P values are indicated in histogram. The P values and error bars are of the same colour as the category that is compared.  $n=3$  experiments. The Myogenin marker has been analysed analysed in 5-10 fields/condition corresponding to  $n=2,500-5,000$  cells/condition, and extrapolated to the total cell number; mean  $\pm$  SD.

#### **Supplementary Figure S4. DNA-PKcs acts upstream of caspases in myogenic differentiation**

Representative merge images of immunofluorescent labelling of C2C7 cells at 2, 5, and 7 dps: Myogenin (red), Myosin HC (green), nuclei counterstained with Hoechst (blue). The experimental planning was as in Figure S3d. Until 2 dps cells were cultured in growth medium, GM (*i.e.* serum-rich). The cells were then treated with vehicle, or 30  $\mu$ M of Caspase inhibitor (Caspi, Q-VD-Oph), or 1  $\mu$ M and 10  $\mu$ M (optimal concentration in GM (see Fig. S1c)) of NU7441 (DNAPKi) in GM or in differentiation medium (DM) (*i.e.* serum-depleted) until 5 dps and 7 dps.

#### **Supplementary Figure S5. Regeneration in WT and SCID mice**

**a)** Representative images of un-injured and regenerating TA sections of WT or SCID mice 5 and 7 dpi. Extracellular matrices bordered by laminin (green) and regenerating fibers marked with eMHC (red), nuclei counter-stained with Hoechst; (quantifications are shown in Fig. 5e-g). **b)** Quantification of regenerating eMHC<sup>+</sup> fibers/mm<sup>2</sup> on TA sections in WT (C57BL/B6) and immunodeficient *Rag2*<sup>-/-</sup> *$\gamma$ c*<sup>-/-</sup> mice.  $n=3$  mice, 10 sections/condition, mean  $\pm$  SD.

Significant P values between conditions by Mann Whitney test are indicated on the histograms. **c)** Representative images of macrophages in un-injured and regenerating TA sections of WT or SCID mice 7 dpi. Extracellular matrices are bordered by laminin (white) and global macrophages are marked with the pan-macrophage marker CD68 (green), M2 macrophages with CD206 (red) and counterstained with Hoechst (blue, nuclei). **d)** Representative zoomed-in images of macrophage populations: M1 (CD68+ CD206-, green) and M2 (CD68+ CD206+, (combined green and red), counterstained with Hoechst (blue). **e)** Quantification of M1, pro-inflammatory macrophages (CD68+ CD206-) and M2, anti-inflammatory macrophages (CD68+ CD206+) in un-injured and regenerating TA sections of WT or SCID mice 7 dpi. n=3 mice, 3 regions of 0.6 mm<sup>2</sup>/condition, mean ± SD. Significance by 2-way ANOVA (F=7.89, DF<sub>n</sub>=3, DF<sub>d</sub>=8, p=0.009), with post-hoc Tukey's multiple comparisons test, significant P values are indicated in the histogram.

### **Supplementary Figure S6. Fiber composition of the TA muscle**

**a)** Representative image an un-injured TA section labeled for different myosin HC isoforms. Extracellular matrices are bordered by laminin (blue) and isoforms of Myosin HC are labeled with Myosin type I (red) for slow fibers, Myosin type IIa (green) for fast oxydative fibers, and Myosin type IIb (yellow) for fast glycolytic fibers; non-labelled fibers are considered Myosin type IIx (black) for fast glycolytic/oxidative intermediate fibers. **b)** Histogram of percentage myosin HC in un-injured and regenerating TA sections of WT or SCID mice at 29 days post-injury (1 injury), and 89 days post injury (3 injuries) (experimental scheme in Fig 5a). n=3 mice, (1380-4587 fibers/condition) mean ± SD. Significance by 2-way ANOVA (F=3.48, DF<sub>n</sub>=15, DF<sub>d</sub>=72, p=0.0002), with post-hoc Tukey's multiple comparisons test, significant P values are indicated in histogram. P values are of the same colour as the category that is compared.
